# Supplementary material for: Drying and rewetting of riverbed sediments results in cold to neutral biogeochemical moments
Source: Research Square preprint supplement (doi:10.21203/rs.3.rs-6711373/v1), 2025-10-31
Supplement: Supplementary file 1 [file c969826585d2cb855b09a0ce.pdf]

**Title:** Drying and rewetting of riverbed sediments results in cold to neutral biogeochemical moments

**Authors:** Vanessa Garayburu-Caruso<sup>+</sup>, Maggi Laan<sup>+</sup>, Laura Coulson, Dillman Delgado, Brienne Forbes, Amy Goldman, Sophia McKeever, Lupita Renteria, Kenton Rod, and James Stegen<sup>\*</sup>

<sup>+</sup>Denotes equal contribution

<sup>\*</sup>Corresponding Author: [James.Stegen@pnnl.gov](mailto:James.Stegen@pnnl.gov)

**Table S1.** Regression coefficients for LASSO models explaining variation in the effect size of O<sub>2</sub> consumption without removing the Fe<sup>2+</sup> outlier. All input variables were cube root transformed to reduce the impact of high leverage points in the regression analysis and standardized as z-scores to enable direct comparison of the regression coefficients. The LASSO model was fit over 100 seeds. Reported mean regression coefficients ( $\beta$ ) and R<sup>2</sup> were averaged for the reported values. Normalized regression coefficients were calculated by dividing each  $\beta$  coefficient by the maximum  $\beta$  coefficient in each seed. Standard deviation (sd) was calculated for each coefficient over the 100 seeds. Values of 0 indicate that the variable was included in the model but not assigned a  $\beta$  coefficient

| R <sup>2</sup> = 0.43                                             | $\beta$ Coefficient | sd    |
|-------------------------------------------------------------------|---------------------|-------|
| Fine Sand (%) <sup>1/3</sup>                                      | 1.0000              | 0     |
| Median ATP (picomol g <sup>-1</sup> ) <sup>1/3</sup>              | 0.90                | 0.02  |
| Median TN (%) <sup>1/3</sup>                                      | 0.27                | 0.1   |
| Median SpC ( $\mu$ S cm <sup>-1</sup> ) <sup>1/3</sup>            | 0.17                | 0.1   |
| Median TOC (%) <sup>1/3</sup>                                     | 0.09                | 0.07  |
| Effect Size TOC (%) <sup>1/3</sup>                                | 0.002               | 0.01  |
| Effect Size Fe (mg kg <sup>-1</sup> ) <sup>1/3</sup>              | 0.0004              | 0.004 |
| Effect Size ATP (picomol g <sup>-1</sup> ) <sup>1/3</sup>         | 0                   | 0     |
| Effect Size Extractable TDN (mg kg <sup>-1</sup> ) <sup>1/3</sup> | 0                   | 0     |
| Effect Size Temperature (°C) <sup>1/3</sup>                       | 0                   | 0     |
| Effect Size TN (%) <sup>1/3</sup>                                 | 0                   | 0     |
| Total Sand (%) <sup>1/3</sup>                                     | 0                   | 0     |
| Coarse Sand (%) <sup>1/3</sup>                                    | 0                   | 0     |

|                                                                             |         |       |
|-----------------------------------------------------------------------------|---------|-------|
| Clay (%) <sup>1/3</sup>                                                     | 0       | 0     |
| Median pH <sup>1/3</sup>                                                    | 0       | 0     |
| Median Temperature (°C) <sup>1/3</sup>                                      | 0       | 0     |
| Median Fe (II) (mg kg <sup>-1</sup> ) <sup>1/3</sup>                        | 0       | 0     |
| Median Extractable NPOC (mg kg <sup>-1</sup> ) <sup>1/3</sup>               | 0       | 0     |
| Median Extractable TDN (mg kg <sup>-1</sup> ) <sup>1/3</sup>                | 0       | 0     |
| Specific Surface Area (m <sup>2</sup> g <sup>-1</sup> ) <sup>1/3</sup>      | 0       | 0     |
| Median Initial Dry Gravimetric Moisture (g g <sup>-1</sup> ) <sup>1/3</sup> | 0       | 0     |
| Median Final Dry Gravimetric Moisture (g g <sup>-1</sup> ) <sup>1/3</sup>   | 0       | 0     |
| Effect Size pH <sup>1/3</sup>                                               | -0.0005 | 0.005 |
| Effect Size Extractable NPOC (mg kg <sup>-1</sup> ) <sup>1/3</sup>          | -0.0002 | 0.002 |
| Medium Sand (%) <sup>1/3</sup>                                              | -0.019  | 0.045 |
| Effect Size Specific Conductivity (μS cm <sup>-1</sup> ) <sup>1/3</sup>     | -0.0146 | 0     |
| Coarse Sand (%) <sup>1/3</sup>                                              | -0.23   | 0.017 |
